# Supplementary material for: Improving the efficiency of fully hydrocarbon-based proton-exchange membrane fuel cells by ionomer content gradients in cathode catalyst layers
Source: Royal Society of Chemistry journal article supplement (doi:10.1039/d2ma00761d), 2022-01-01
Supplement: d2ma00761d1.pdf [file d2ma00761d1.pdf]

Supporting information

# Improving the efficiency of fully hydrocarbon-based proton-exchange membrane fuel cells by ionomer content gradients in cathode catalyst layers

Hien Nguyen<sup>1,2</sup>, Dilara Sultanova<sup>2</sup>, Philipp A. Heizmann<sup>1,3</sup>, Severin Vierrath<sup>1,2,3</sup>, and Matthias Breitwieser<sup>1,2</sup>

1. Electrochemical Energy Systems, IMTEK - Department of Microsystems Engineering, University of Freiburg, Georges-Koehler-Allee 103, 79110 Freiburg, Germany
2. Hahn-Schickard, Georges-Koehler-Allee 103, 79110 Freiburg, Germany
3. University of Freiburg, Institute and FIT – Freiburg Center for Interactive Materials and Bioinspired Technologies, Georges-Köhler-Allee 105, 79110 Freiburg, Germany

Figure S1 shows that the MEAs with IPA:H<sub>2</sub>O = 1:1 w/w vs MeOH:H<sub>2</sub>O = 3:1 w/w in the anode (I/C = 0.2) show no significant difference in performance.

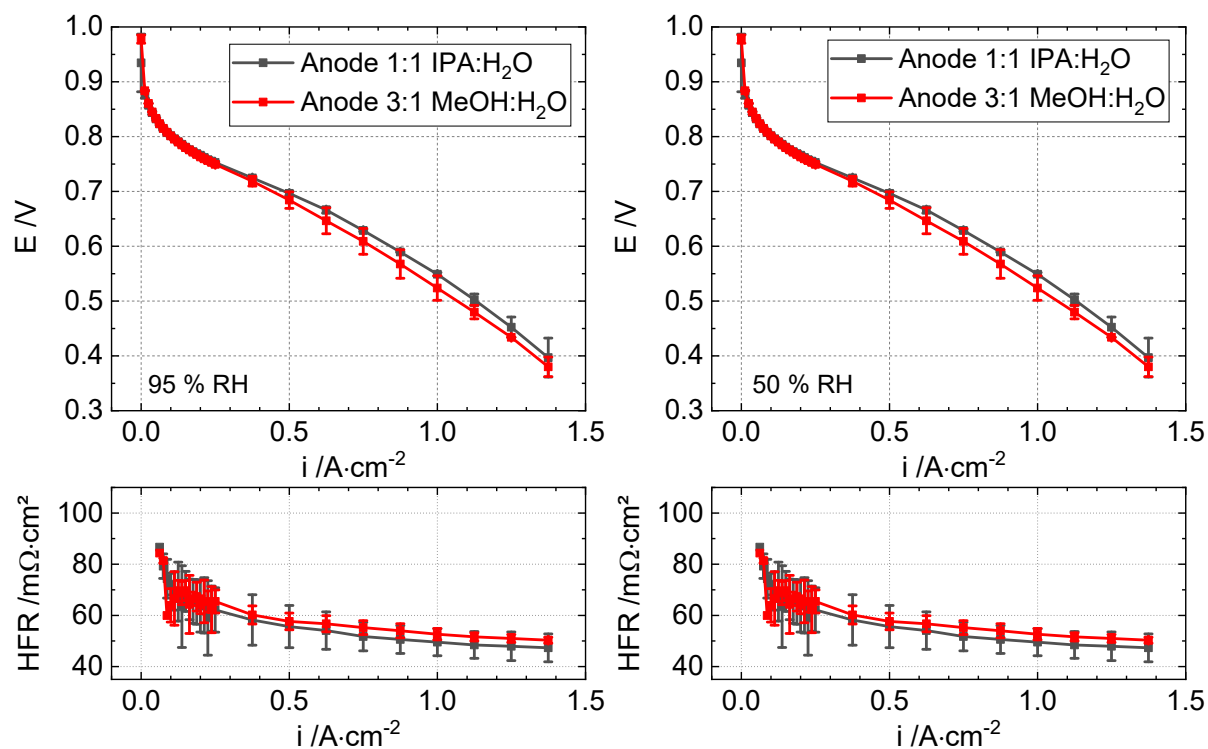

Figure S1: Performance of MEAs with different anode dispersion media (MeOH:H<sub>2</sub>O = 3:1 w/w vs IPA:H<sub>2</sub>O = 1:1 w/w). Testing conditions: H<sub>2</sub>/air, 80 °C, 250 kPa<sub>abs</sub> and 95 % RH (left) or 50 % RH (right).

The cyclic voltammograms (CVs) of all samples presented in this work (pure I/Cs and graded cathode I/C) are shown in Figure S2, indicating that neither the I/C nor the dual-layer approach causes any change in the ECSA or the form of the CVs.

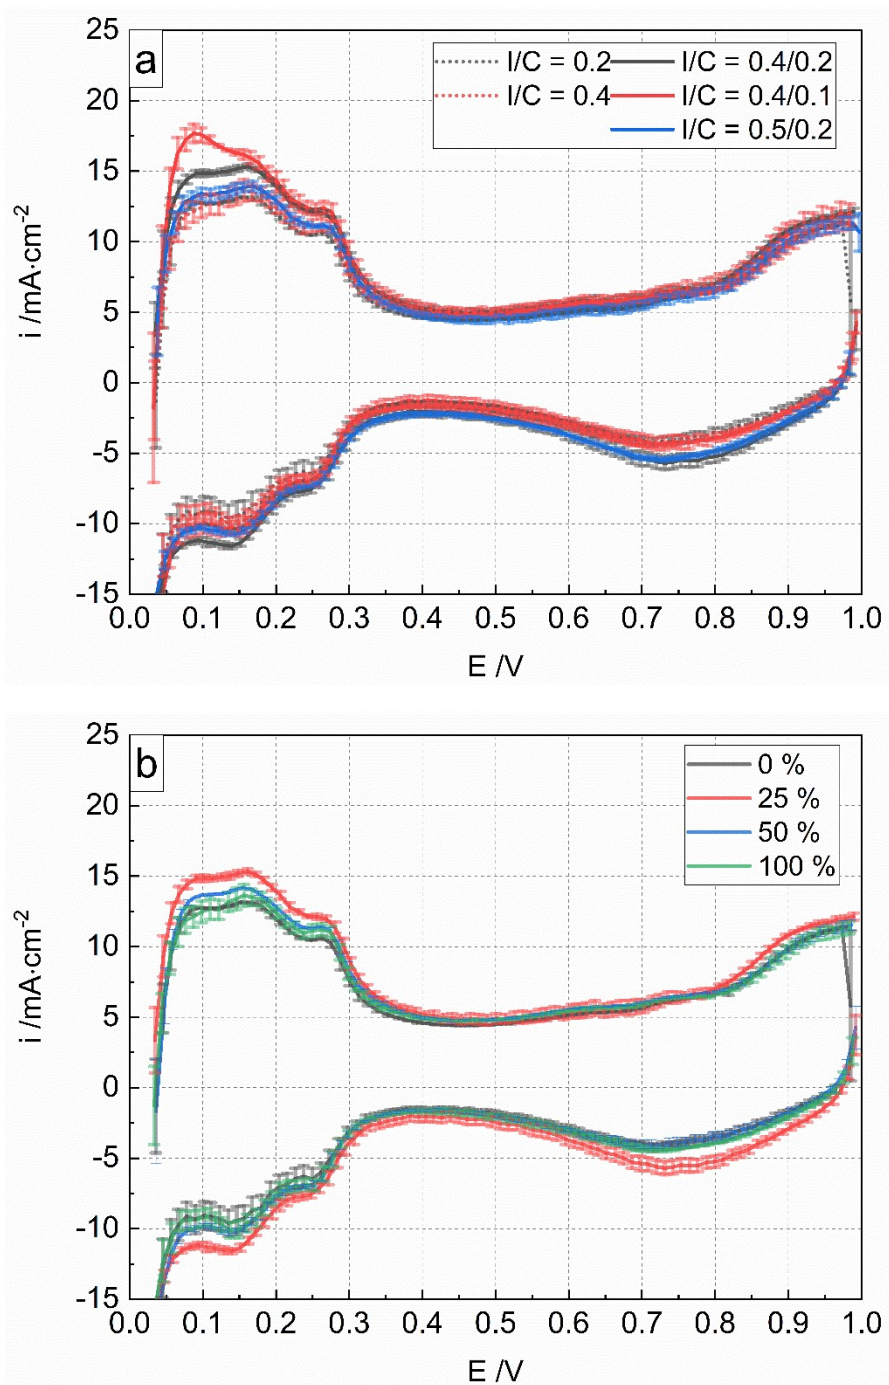

Figure S2: Cyclic voltammograms (CVs) of MEAs with homogeneous and graded ionomer content in the cathode catalyst layer (a) and CVs of an increasing proportion of I/C = 0.4 in the cathode sub-layer I (b): 0 % of I/C = 0.4 corresponds to the I/C ratio in sub-layer II = 0.2). Testing conditions: 35 °C, 96 % RH, ambient pressure.

The Tafel plot and the mass-specific current density  $i_m$  of the MEAs with different pure and graded cathode I/Cs are shown in Figure S3. It can be seen that the Tafel slopes of all MEAs are in the same range and normalized current density with Pt loading, *i.e.* mass-specific current density  $i_m$  vs  $E_{\text{HFR-free}}$ . The data for each cathode I/C (pure and graded) fall onto a straight line in this semi-logarithmic plot over the entire current density range of 30 – 100 mA cm<sup>-2</sup>, indicating no change in the ORR kinetics with varying I/C in the pure and the graded cathode CLs.

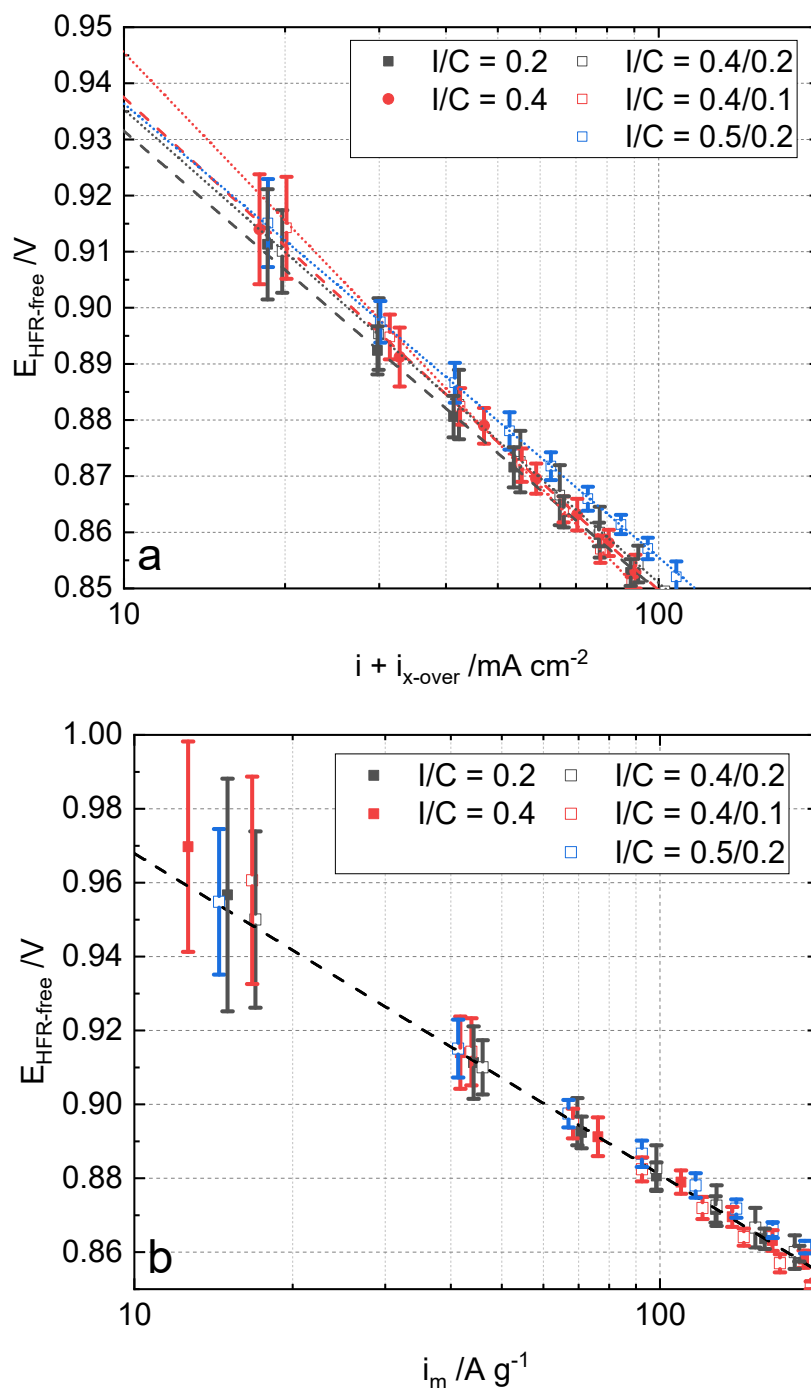

Figure S3: Tafel plot (a) and mass-specific current density vs the HFR-corrected cell voltage  $E_{\text{HFR-free}}$  (b) of the MEAs with varied I/C in the sub-layer I and II. Test conditions: 80 °C, 96 % RH, 150 kPa<sub>obs</sub>.

Similar to Figure S3, Figure S4 shows the Tafel plot and the mass-specific current density  $i_m$  of the MEAs with different proportions of  $I/C = 0.4$  in the cathode catalyst layers, with 0 % of the cathode  $I/C = 0.4$  being an  $I/C$  of 0.2. It can also be seen here that the data for each proportion fall onto a straight line in this semi-logarithmic plot over the entire current density range of 30 – 100  $\text{mA cm}^{-2}$ , indicating no change in the ORR kinetics via the dual-layer approach.

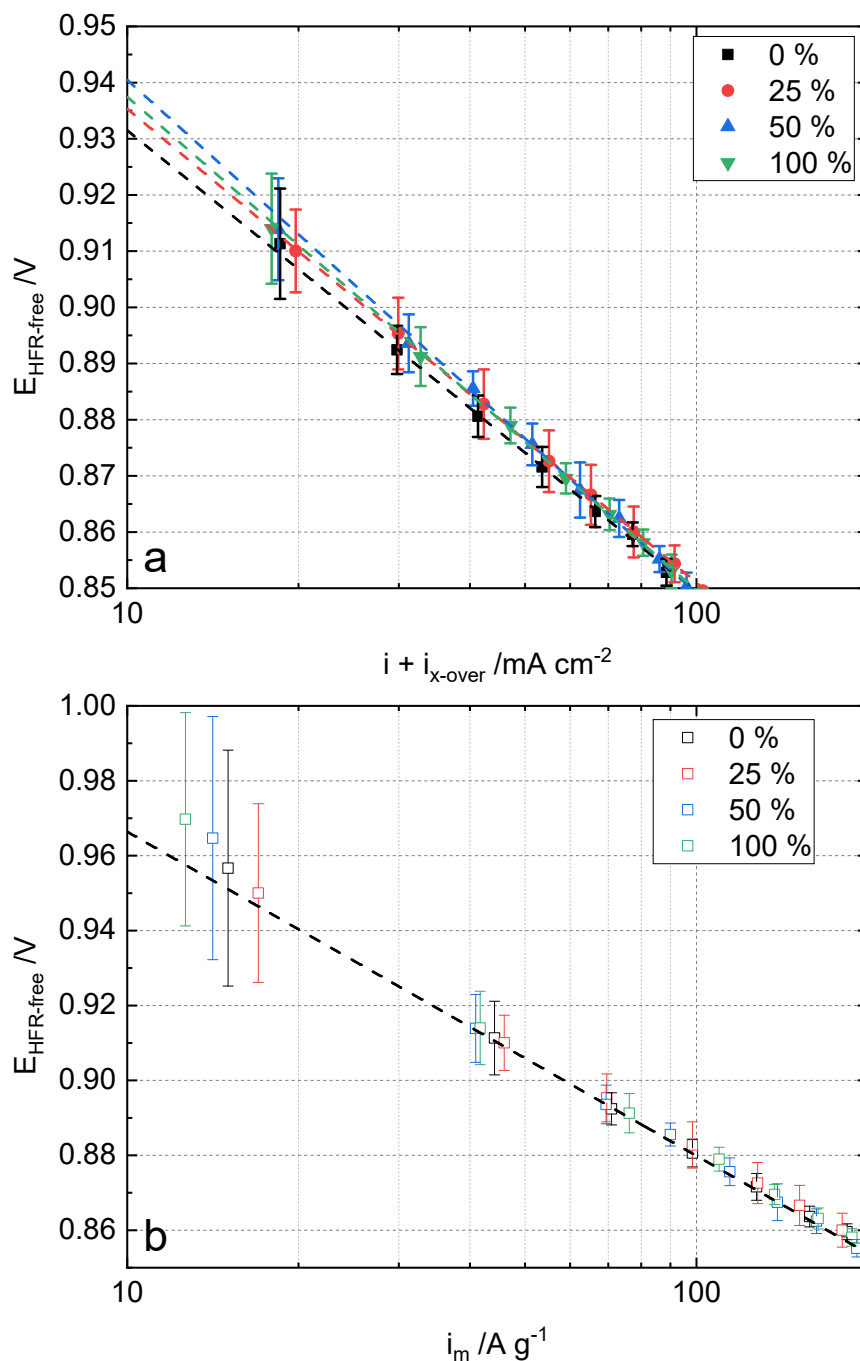

Figure S4: Tafel plot (a) and mass-specific current density vs the HFR-corrected cell voltage  $E_{\text{HFR-free}}$  (b) of the MEAs with varied proportion of  $I/C = 0.4$  in the sub-layer I and II (0 % of  $I/C = 0.4$  corresponds to a cathode  $I/C = 0.2$ ). Test conditions: 80 °C, 96 % RH, 150  $\text{kPa}_{\text{abs}}$ .



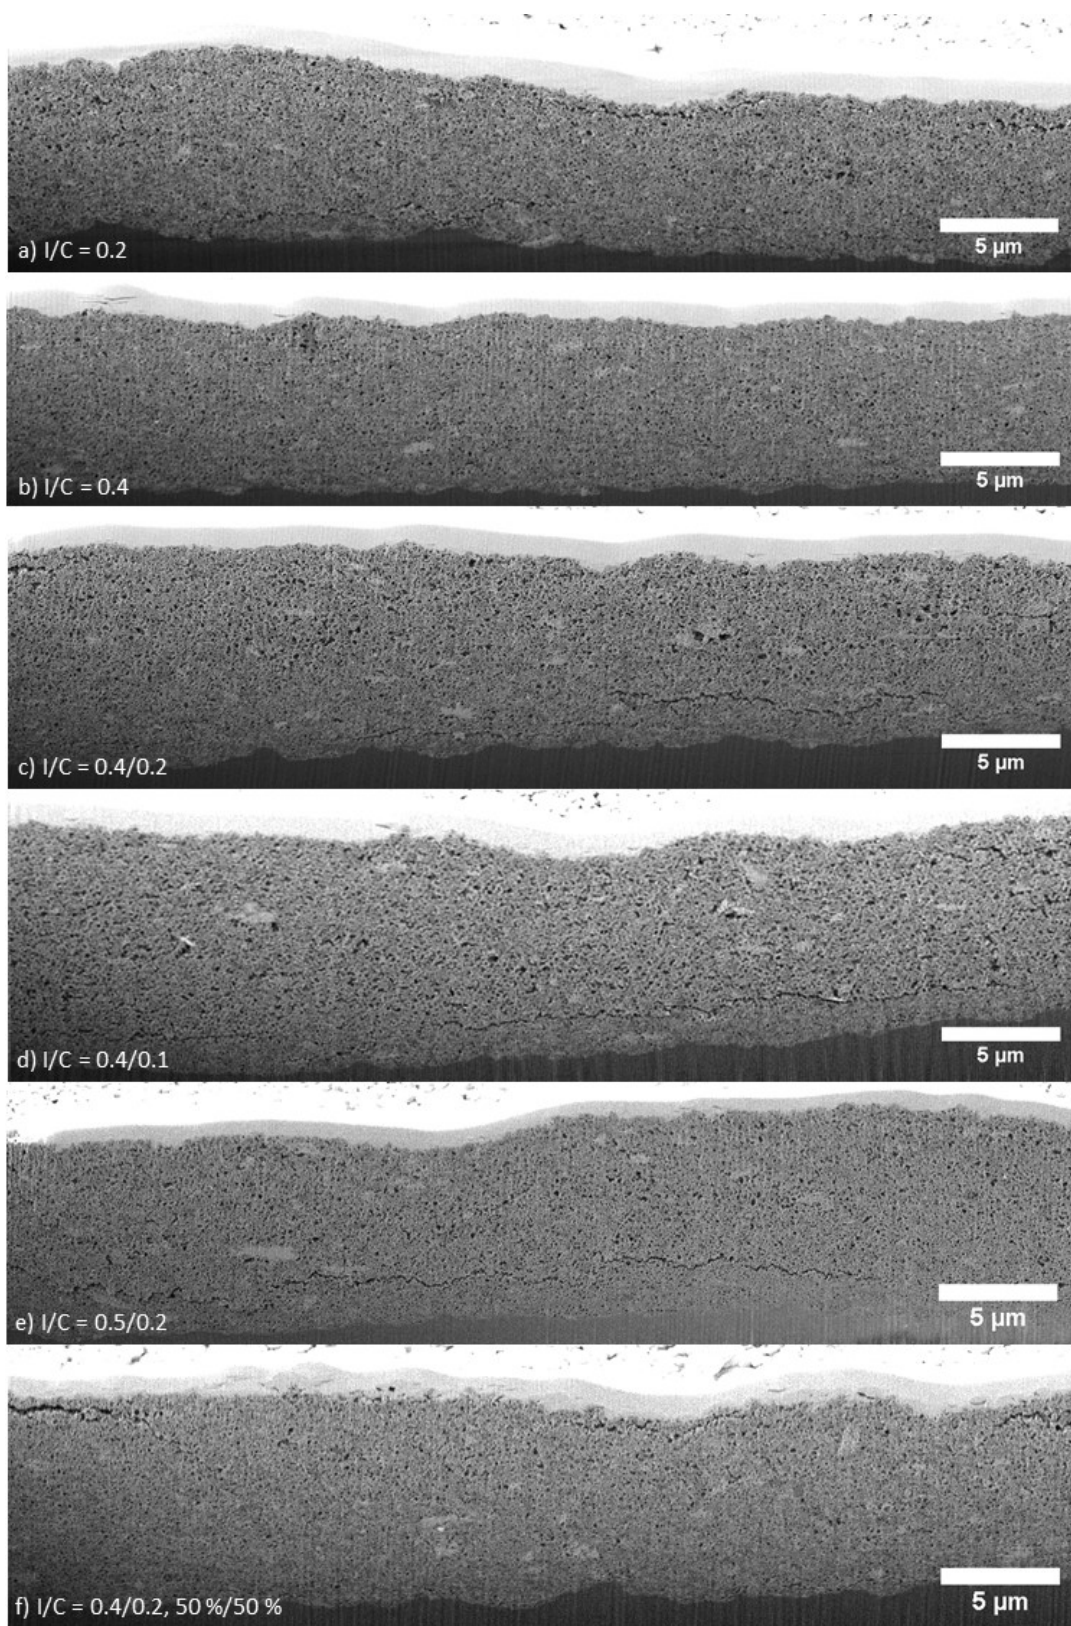

Figure S5a-f: Representative cross-sections of MEAs with varying graded ionomer content. *No representative physical instability was observed within or on top of the gradient ionomer CL before or after the electrochemical tests.*

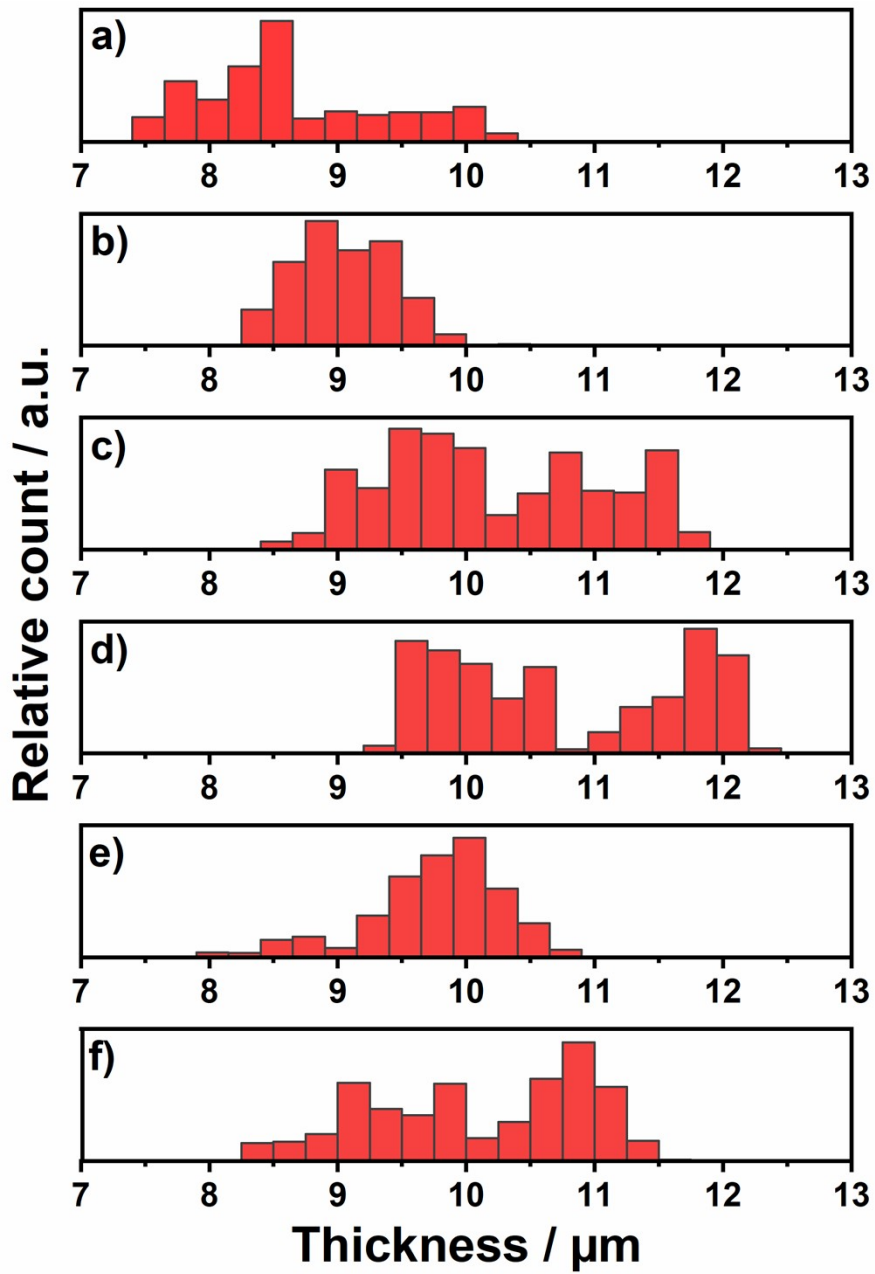

Figure S6a-f: Histograms of the layer thicknesses obtained from the FIB cross sections from Fig. S5a-f.

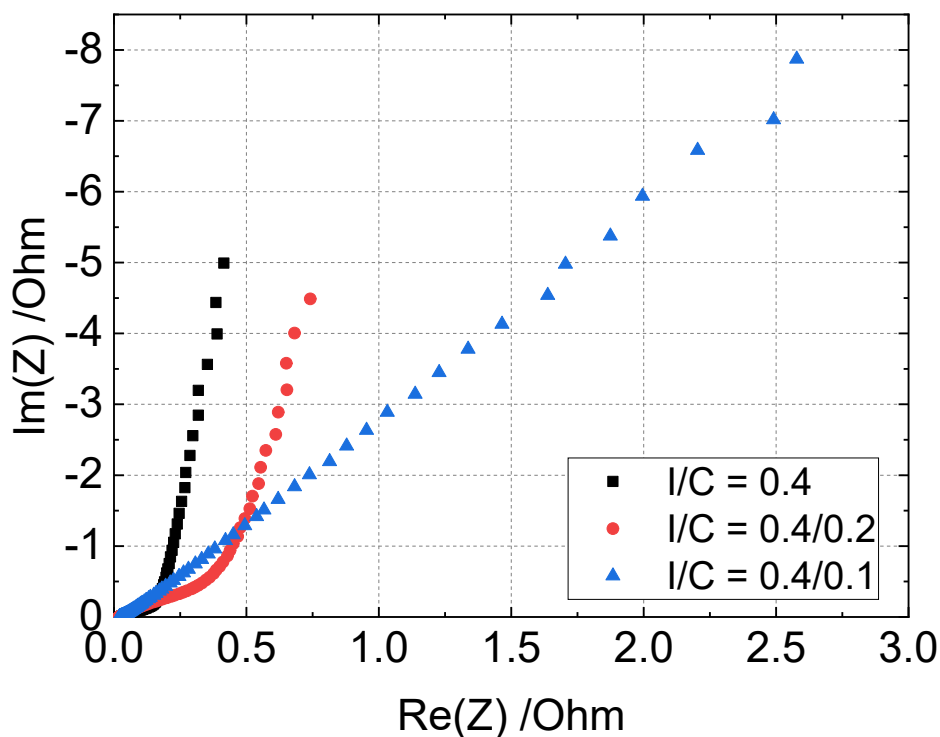

Figure S7: Nyquist plot of MEAs with different outer cathode I/Cs. Testing conditions: 80 °C, 50 % RH and 150 kPa<sub>abs</sub>.

Figure S8 shows the Nafion cell with an I/C of 0.6, corresponding to 25 wt % ionomer content in the CL, has the most balanced performance at operation-relevant potential (e.g.  $E = 0.6 - 0.7$  V) and peak power density under H<sub>2</sub>/air, 95 °C, 50 % RH and 80 % RH, 250 kPa<sub>abs</sub>.

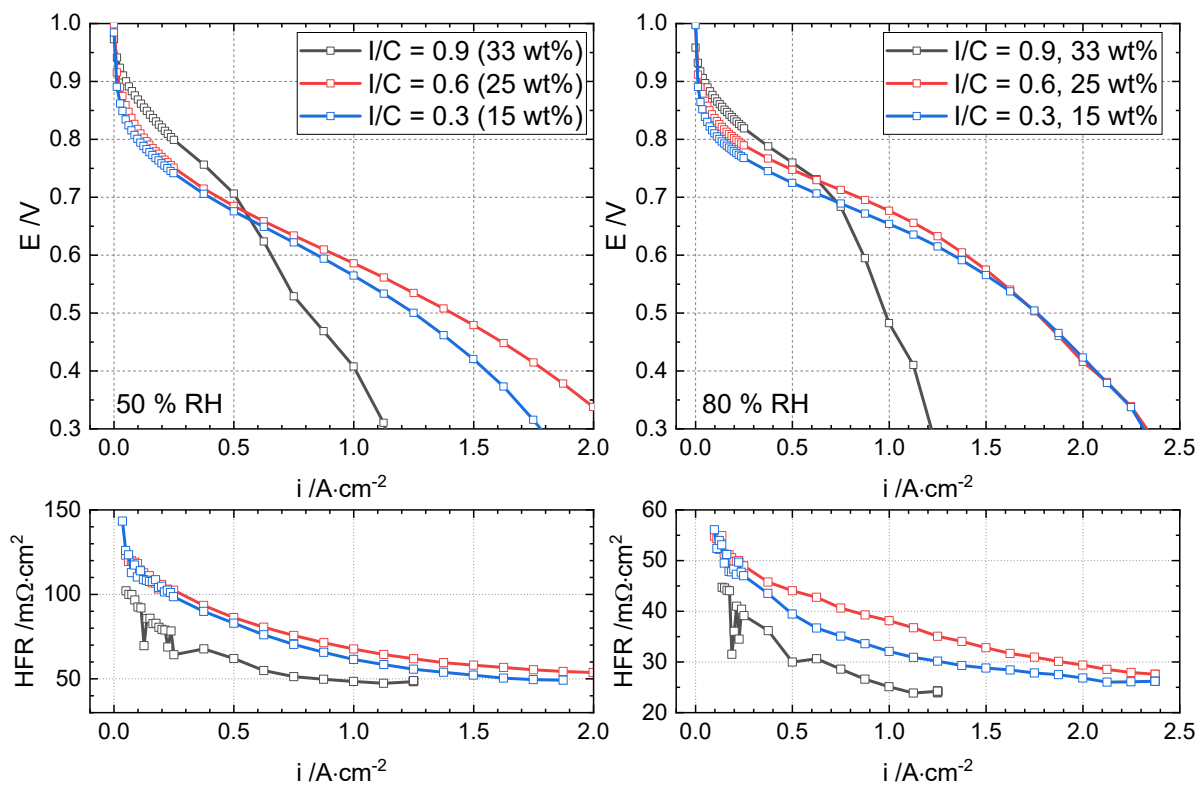

Figure S8: Performance of Nafion catalyst layers with different ionomer content/ionomer-to-carbon (I/C) ratio. Testing conditions: H<sub>2</sub>/air, 95 °C, 250 kPa<sub>abs</sub> and 50 % RH (left) or 80 % RH (right).
